# Supplementary material for: Loss of Par3 promotes lung adenocarcinoma metastasis through 14-3-3ζ protein
Source: PubMed Central journal article supplement (PMC5325440; doi:10.18632/oncotarget.11728), 2016-08-31
Supplement: oncotarget-07-64260-s001.pdf [file oncotarget-07-64260-s001.pdf]

## Loss of Par3 promotes lung adenocarcinoma metastasis through 14-3-3 $\zeta$ protein

### SUPPLEMENTARY FIGURES

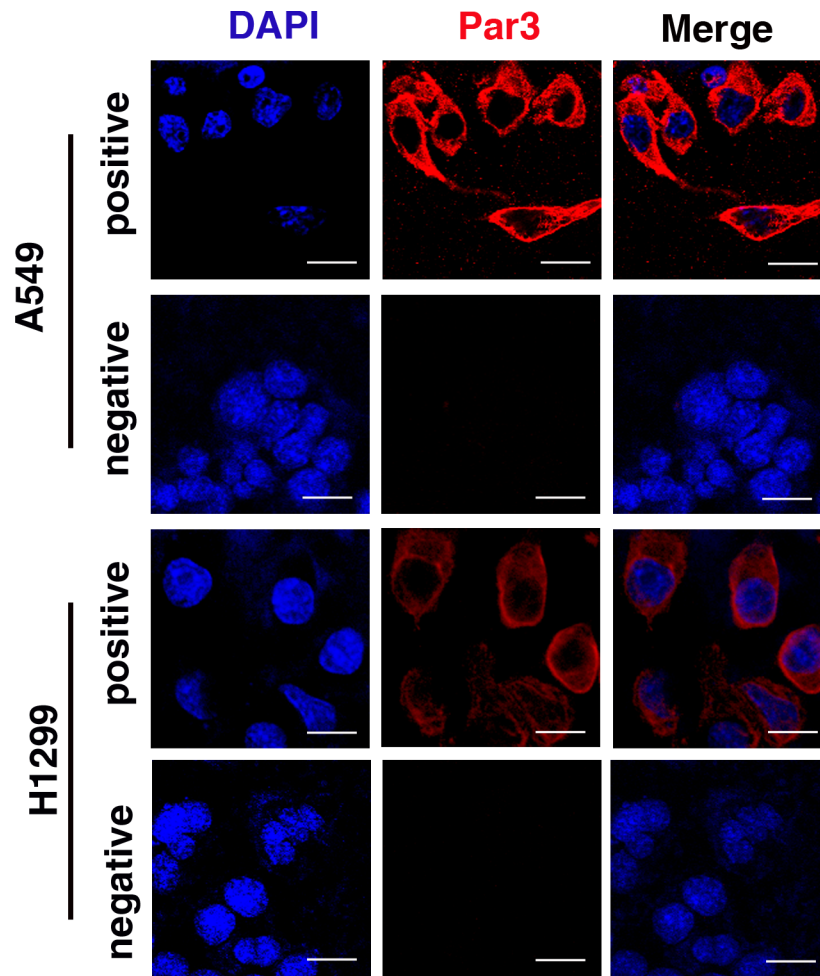

**Supplementary Figure 1: Validation of negative control in A549 and H1299 cells by immunofluorescent staining.** Negative group incubated with no primary antibody but with a goat anti-rabbit secondary antibody. Positive group incubated with Par3 antibody. Bars: 25  $\mu$ m.

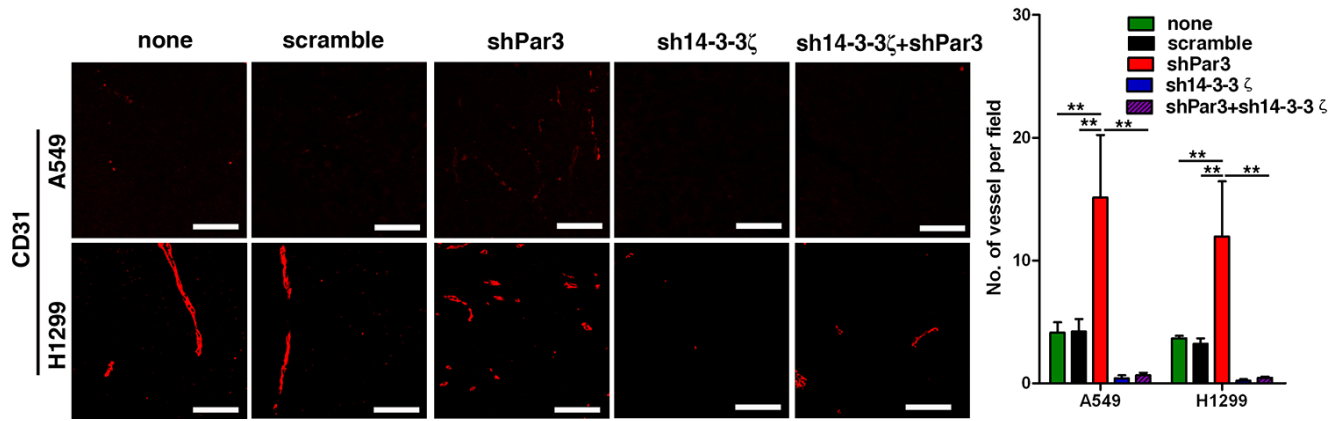

**Supplementary Figure 2: Tumor angiogenesis was assessed with IF staining using an antibody against CD31.** Bars: 25  $\mu$ m. All quantitative data are shown in the right panel. \*  $P < 0.05$ , \*\*  $P < 0.01$ .

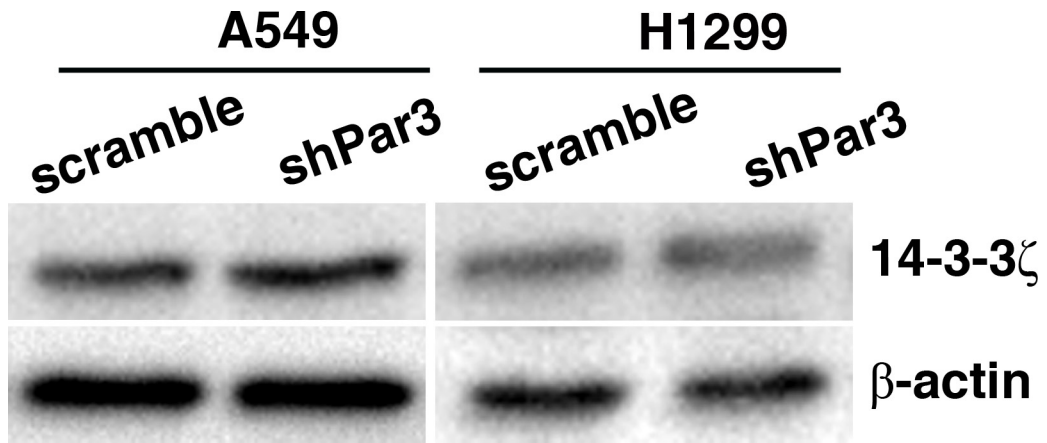

Supplementary Figure 3: Western blot analysis of 14-3-3 $\zeta$  expression in A549 and H1299 cells.
